# Supplementary material for: Access to sexual and reproductive health commodities in East and Southern Africa: a cross-country comparison of availability, affordability and stock-outs in Kenya, Tanzania, Uganda and Zambia
Source: Springer Nature journal article supplement (doi:10.1186/s12889-020-09155-w), 2020-07-03
Supplement: MOESM1 [file 18145980]

## Additional file 1

**Table 1.** Surveyed sexual and reproductive health commodities.

| Services                           | Commodities                                                                                                                                                                                                                                                                                                                                                                                                                                                                                                                                                                                                                                                                                                                                                                                                                                              |
|------------------------------------|----------------------------------------------------------------------------------------------------------------------------------------------------------------------------------------------------------------------------------------------------------------------------------------------------------------------------------------------------------------------------------------------------------------------------------------------------------------------------------------------------------------------------------------------------------------------------------------------------------------------------------------------------------------------------------------------------------------------------------------------------------------------------------------------------------------------------------------------------------|
| <b>Family Planning</b>             |                                                                                                                                                                                                                                                                                                                                                                                                                                                                                                                                                                                                                                                                                                                                                                                                                                                          |
|                                    | Ethinylestradiol + levonorgestrel 30mcg/150mcg<br>Ethinylestradiol + norethisterone 50mcg/1.0mg <sup>a,b,d</sup><br>Ethinylestradiol + norethisterone 35mcg/1.0mg <sup>b,c</sup><br>Ethinylestradiol + norethisterone 30mcg/30mcg <sup>a,c,d</sup><br>Ethinylestradiol + desorgestrel 50mcg/250mcg <sup>a,b,d</sup><br>Ethinylestradiol + desorgestrel 30mcg/15mcg <sup>a,c,d</sup><br>Levonorgestrel 30mcg<br>Levonorgestrel 750mcg<br>Medroxyprogesterone acetate 150ml in 1ml<br>Medroxyprogesterone acetate 104ml in 1ml <sup>b,d</sup><br>Estradiol cypionate + medroxyprogesterone acetate<br>5mg/25mg <sup>b,c,d</sup><br>Norethisterone enanthate 200mg/ml in 1ml <sup>a</sup><br>Male condoms: 3 per pack<br>Female condoms: 1 per pack<br>Intrauterine contraceptive device<br>Implants: levonorgestrel<br>Implants: etonogestrel<br>Diaphragm |
| <b>Maternal Health</b>             |                                                                                                                                                                                                                                                                                                                                                                                                                                                                                                                                                                                                                                                                                                                                                                                                                                                          |
|                                    | Oxytocin injection 10IU, 1ml<br>Misoprostol 200mcg<br>Methyldopa 250mg<br>Magnesium sulphate 500mg/ 1ml <sup>a,b,d</sup><br>Magnesium sulphate 500mg/ 2ml<br>Magnesium sulphate 500mg/ 10ml<br>Calcium gluconate 100mg/ml in 10ml ampoule<br>Ferrous salt 200mg<br>Folic acid 5mg<br>Ferrous Salt: Folic Acid 60mg/400mcg<br>Ferrous Salt: Folic Acid 200mg/500mcg <sup>a,b,d</sup><br>Ferrous Salt: Folic Acid 150mg/500mcg <sup>c</sup>                                                                                                                                                                                                                                                                                                                                                                                                                |
| <b>Antibiotics and Antifungals</b> |                                                                                                                                                                                                                                                                                                                                                                                                                                                                                                                                                                                                                                                                                                                                                                                                                                                          |
|                                    | Metronidazole 200mg<br>Clotrimazole pessary 100mg <sup>a,b,d</sup><br>Clotrimazole pessary 500mg <sup>c</sup><br>Clotrimazole cream 1%, 15g tube<br>Gentamicin 80mg/2ml <sup>a,b,d</sup><br>Gentamicin 40mg/1ml <sup>c</sup><br>Procaine benzylpenicillin powder for injection 3MU <sup>a,b,c</sup><br>Procaine benzylpenicillin powder for injection 4MU <sup>a,d</sup><br>Benzyl penicillin powder for injection 600mg <sup>b,d</sup><br>Benzyl penicillin injection 5MU <sup>a,b,c</sup><br>Benzathine benzylpenicillin 2.4MU in 10ml <sup>a</sup><br>Benzathine benzylpenicillin 900mg <sup>b,c,d</sup><br>Amoxicillin 125mg/5ml syrup <sup>a,b,c</sup><br>Amoxicillin 125mg <sup>d</sup><br>Amoxicillin 250mg                                                                                                                                       |

| <b>Newborn and Child Health</b> |                                             |
|---------------------------------|---------------------------------------------|
|                                 | Dexamethasone 4mg/ml                        |
|                                 | Zinc syrup 10mg in 5ml syrup                |
|                                 | Zinc tablet 20mg                            |
|                                 | Zinc ORS co-pack 10mg tablet/1L             |
|                                 | ORS sachets 200ml                           |
|                                 | ORS sachets 500ml                           |
|                                 | ORS sachets 1L                              |
|                                 | Safe Delivery Kit                           |
|                                 | Chlorhexidine 4%                            |
| <b>SRH medical devices</b>      |                                             |
|                                 | Vasectomy kit                               |
|                                 | Tubal ligation kit                          |
|                                 | Manual Vacuum Aspiration (MVA) kit          |
|                                 | Speculum                                    |
|                                 | Cervical dilator                            |
|                                 | Incubator                                   |
|                                 | Monitor                                     |
|                                 | Ultrasound scan                             |
|                                 | Ventilator                                  |
|                                 | Foetal scope                                |
|                                 | Resuscitator (adult size)                   |
|                                 | Resuscitator (infant size)                  |
|                                 | Bag and mask (size 0)                       |
|                                 | Suction device                              |
|                                 | Training mannequin for infant resuscitation |

<sup>a</sup> not surveyed in Kenya

<sup>b</sup> Not surveyed in Tanzania

<sup>c</sup> Not surveyed in Uganda

<sup>d</sup> Not surveyed in Zambia
