# Supplementary material for: Access to sexual and reproductive health commodities in East and Southern Africa: a cross-country comparison of availability, affordability and stock-outs in Kenya, Tanzania, Uganda and Zambia
Source: Springer Nature journal article supplement (doi:10.1186/s12889-020-09155-w), 2020-07-03
Supplement: MOESM2 [file 18145980]

Additional file 2

Figure 1. Accessibility of SRHC in Kenya, Tanzania, Uganda and Zambia, per sector.

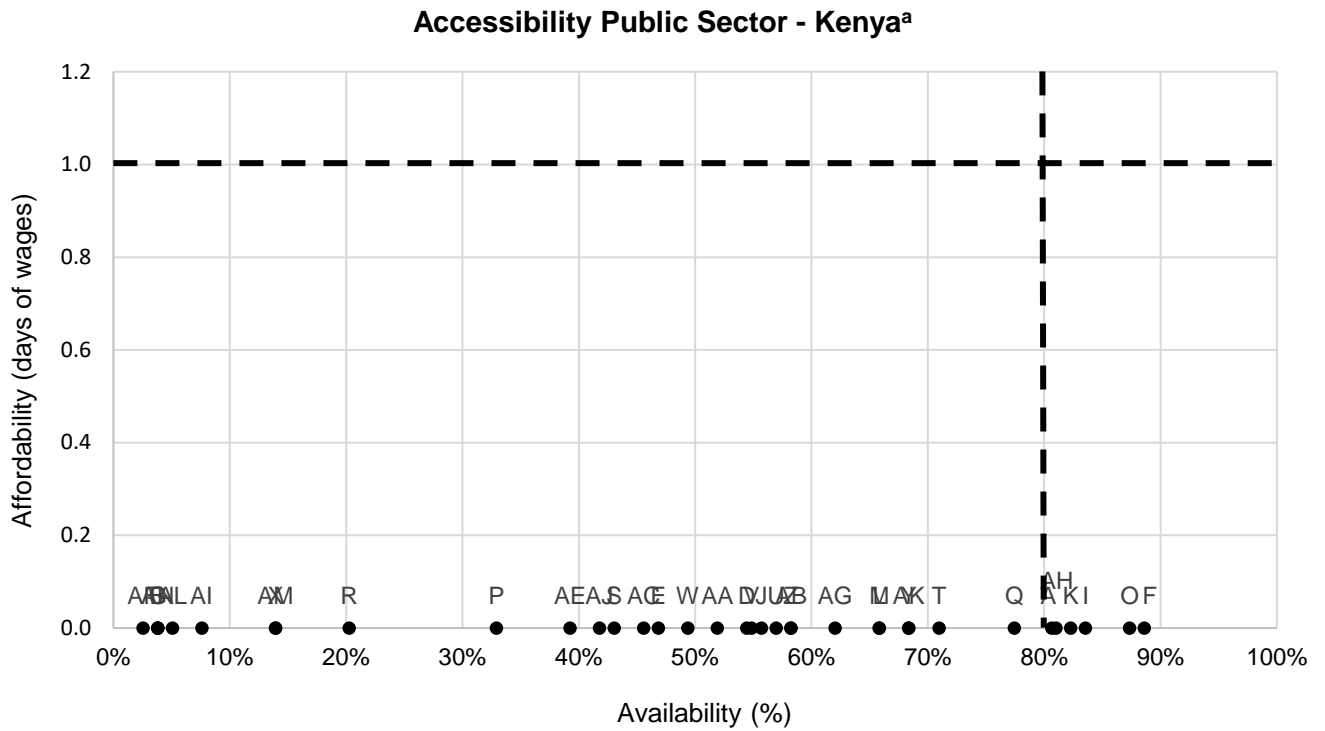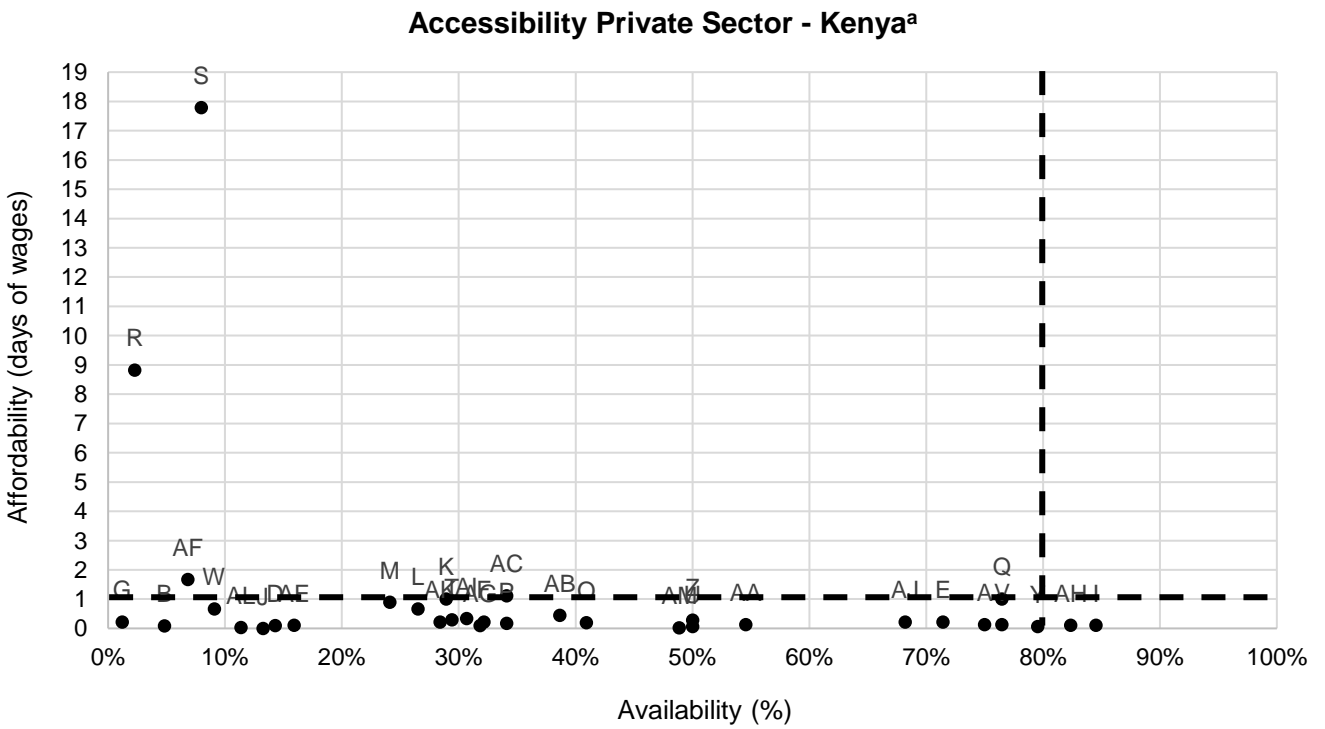

### Accessibility Private Not-For-Profit Sector - Kenya<sup>a</sup>

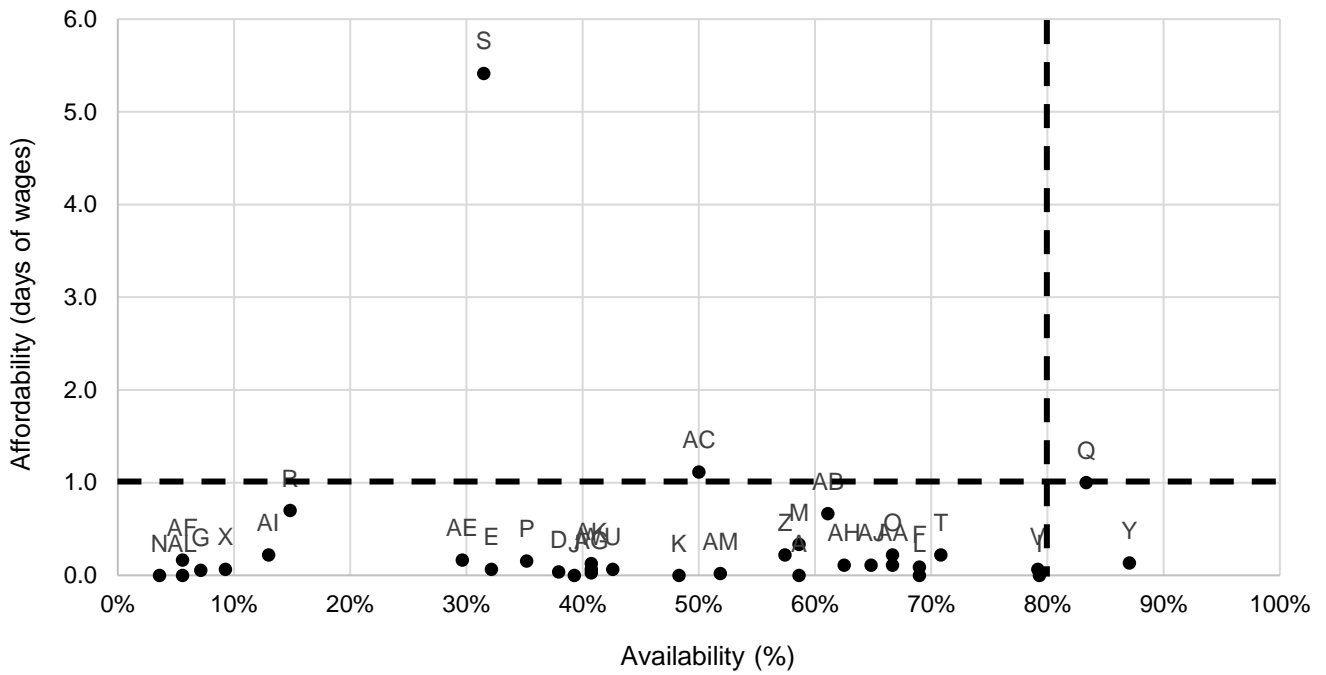

### Accessibility Public Sector - Tanzania<sup>a</sup>

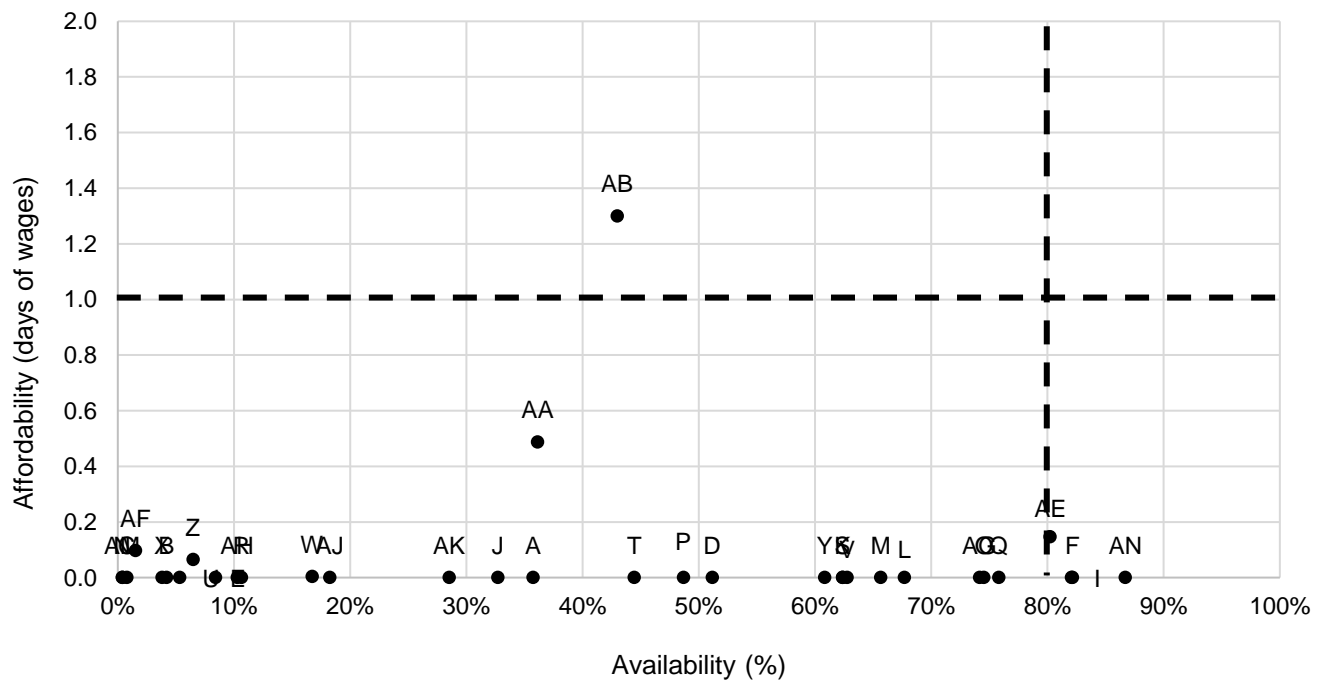

### Accessibility Private Not-For-Profit Sector - Tanzania<sup>a</sup>

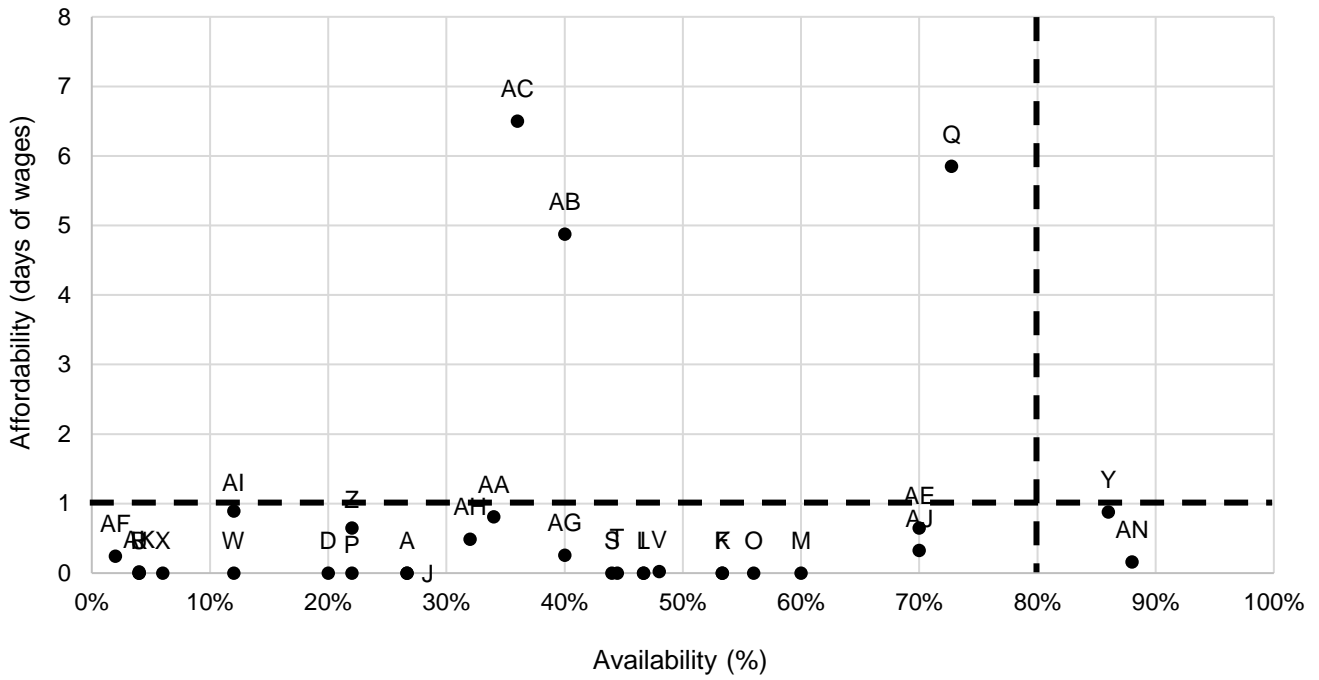

### Accessibility Public Sector - Uganda<sup>a</sup>

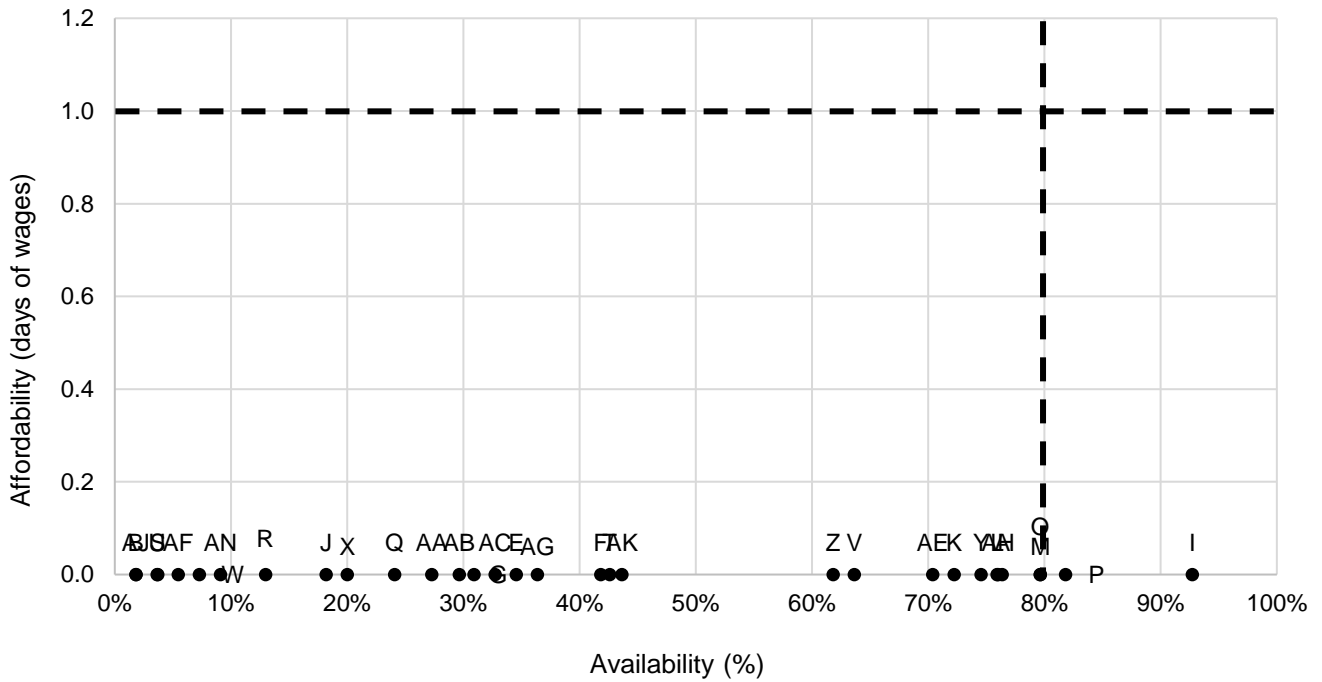

### Accessibility Private Sector - Uganda<sup>a</sup>

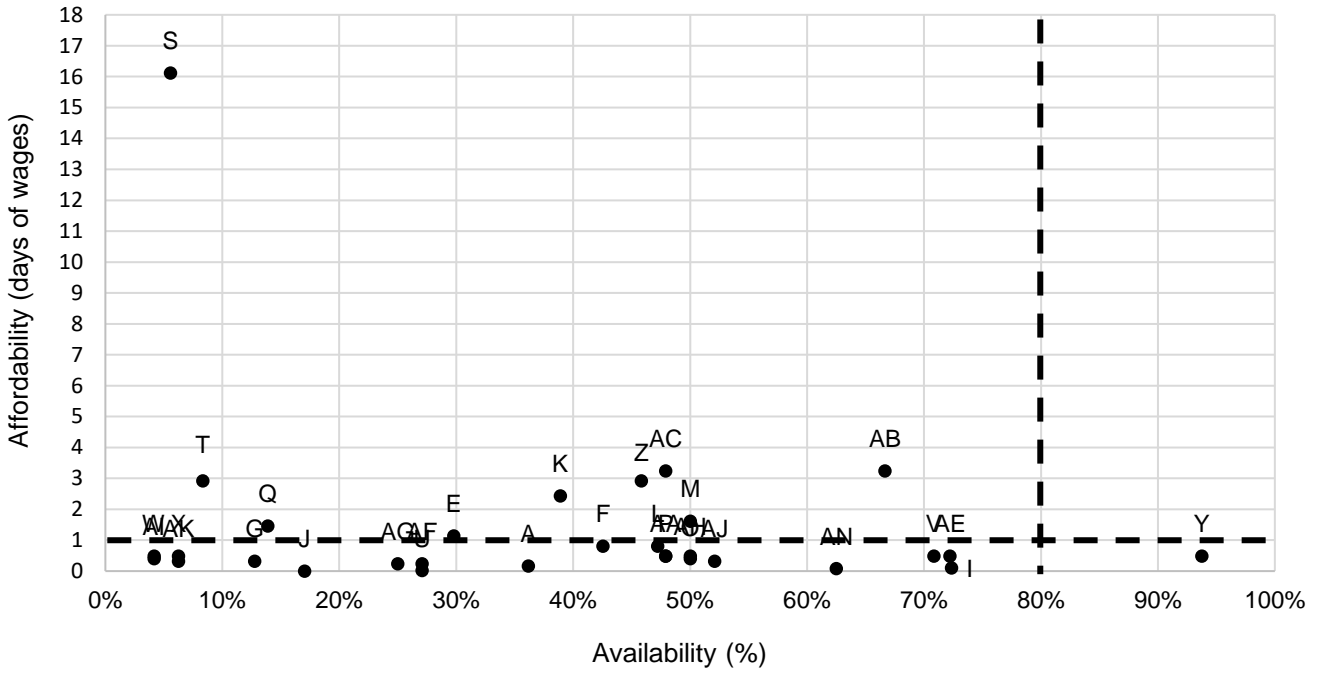

### Accessibility Private Not-For-Profit Sector - Uganda<sup>a</sup>

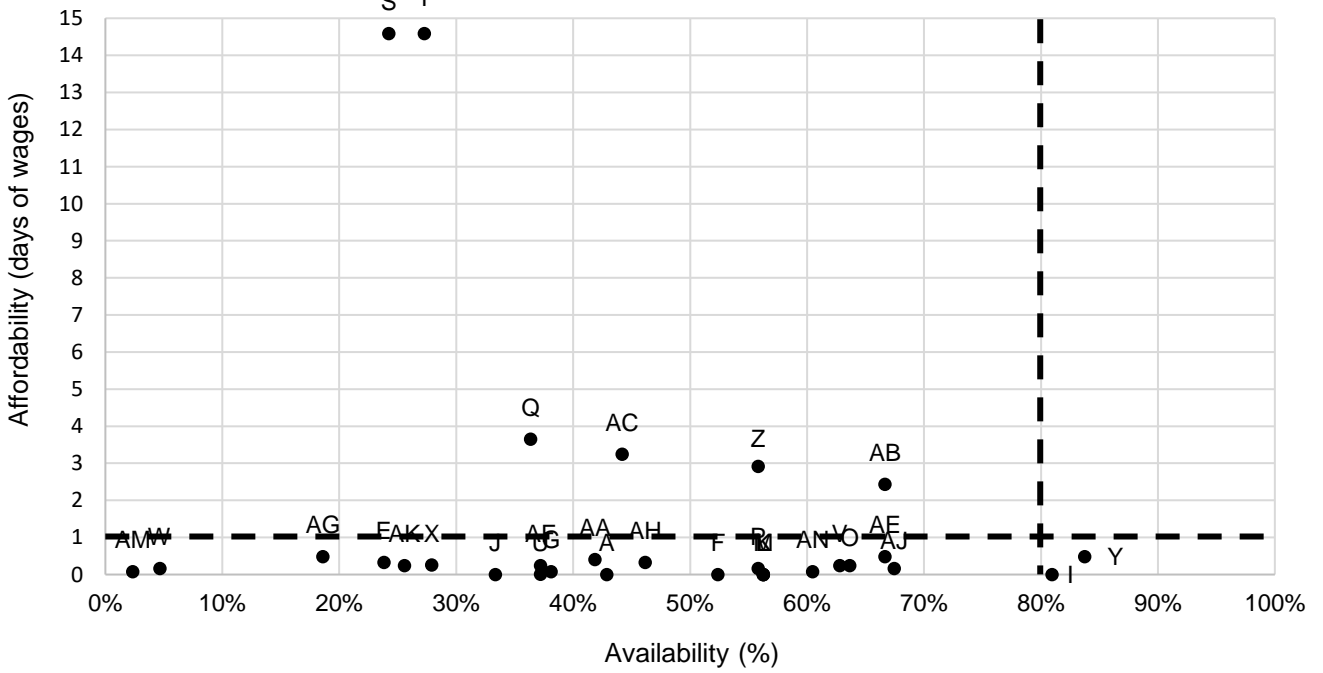

### Accessibility Public Sector - Zambia<sup>a</sup>

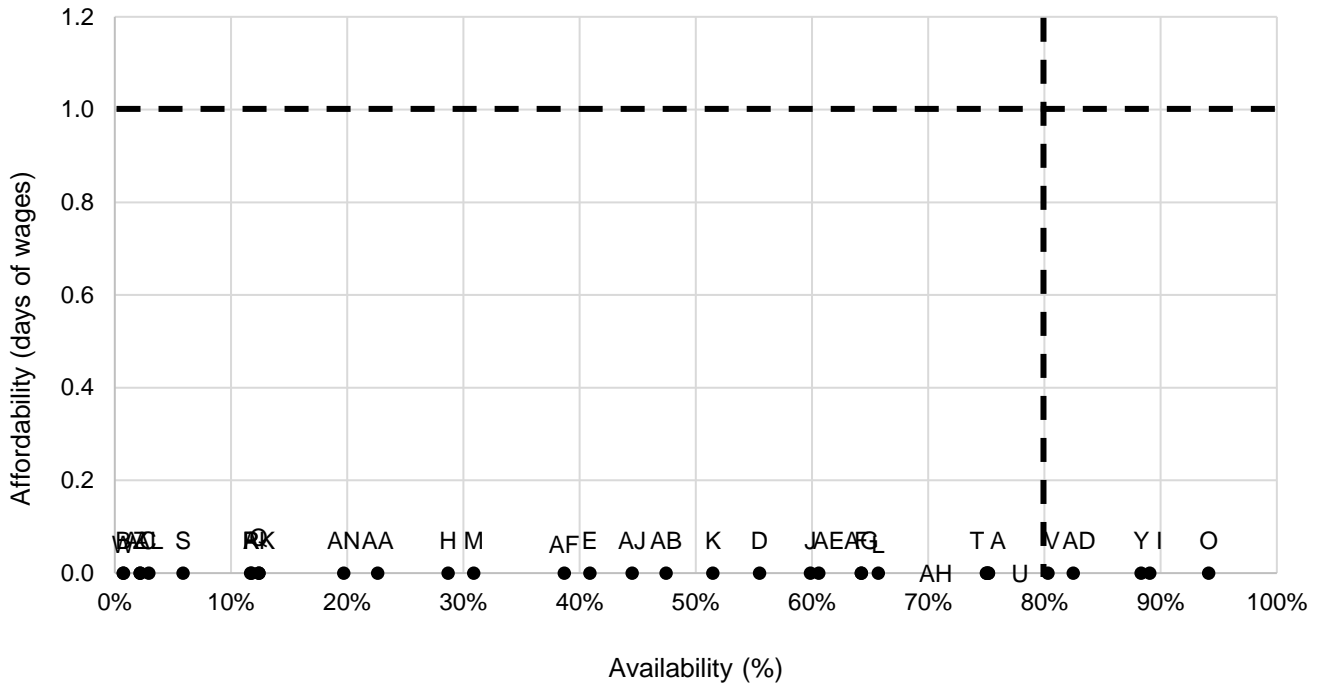

### Accessibility Private Sector - Zambia<sup>a</sup>

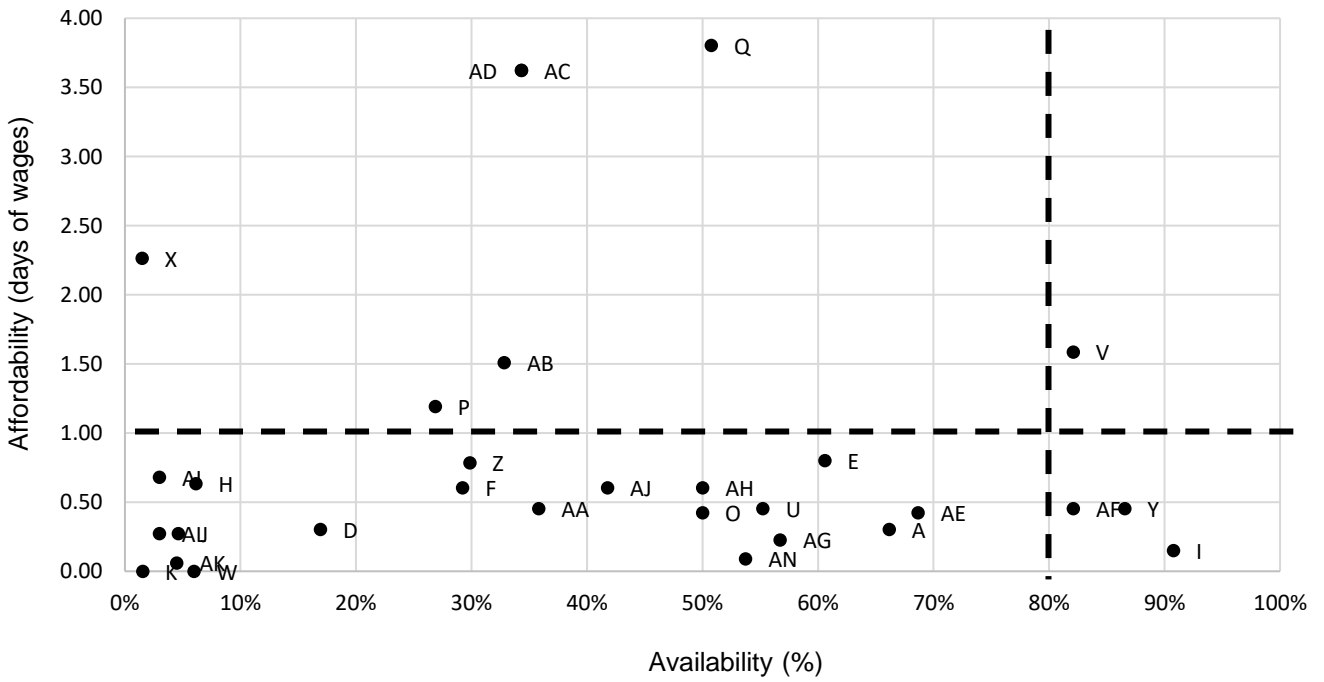

### Accessibility Private Not-For-Profit Sector - Zambia<sup>a</sup>

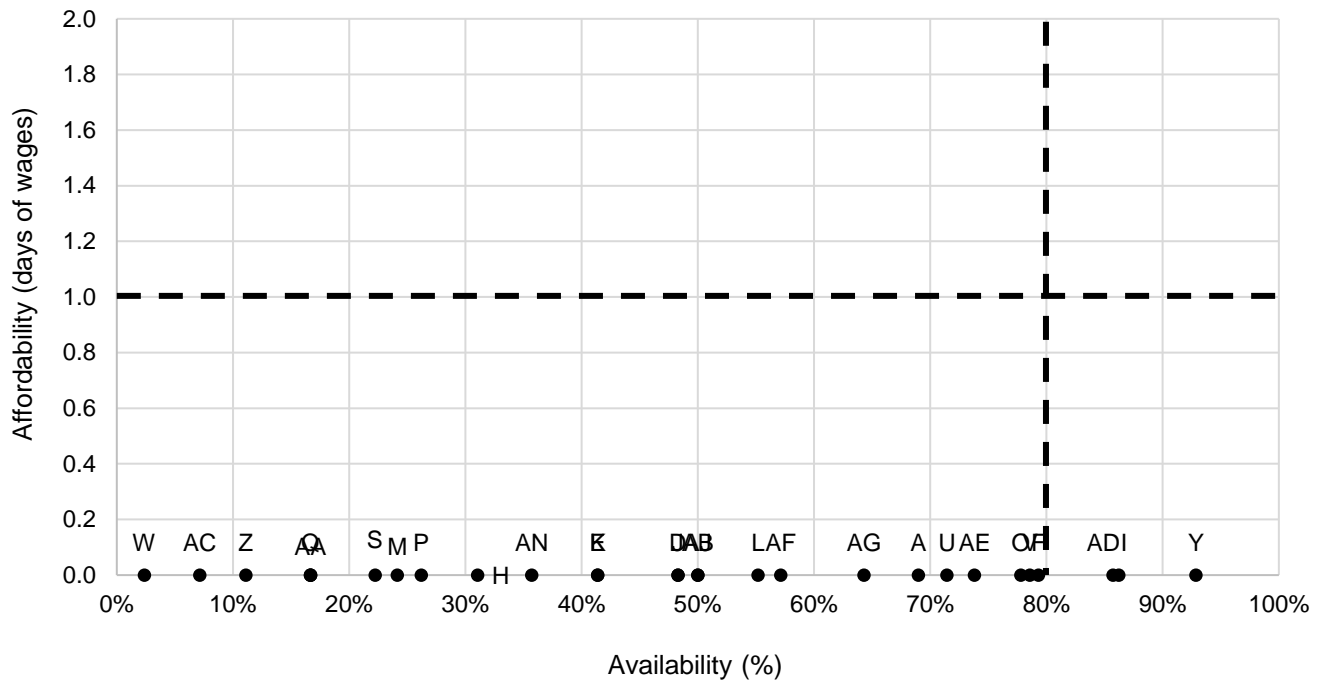

<sup>a</sup>A: Ethinylestradiol + levonorgestrel; B: Ethinylestradiol + norethisterone; C: Ethinylestradiol + desorgestrel; D: Levonorgestrel 30mcg; E: Levonorgestrel 750mcg; F: Medroxyprogesterone acetate 150ml; G: Medroxyprogesterone acetate 104ml; H: Norethisterone enanthate; I: Male condoms; J: Female condoms; K: Intrauterine contraceptive device; L: Implants: levonorgestrel; M: Implants: etonogestrel; N: Diaphragm; O: Oxytocin injection; P: Misoprostol; Q: Methyldopa; R: Magnesium sulphate 500mg/ 2ml; S: Magnesium sulphate 500mg/ 10ml; T: Calcium gluconate; U: Ferrous salt; V: Folic acid; W: Ferrous Salt: Folic Acid 60/400; X: Ferrous Salt: Folic Acid 150/500; Y: Metronidazole; Z: Clotrimazole pessary; AA: Clotrimazole cream; AB: Gentamicin; AC: Procaine benzylpenicillin; AD: Benzyl penicillin; AE: Benzathine benzylpenicillin; AF: Amoxicillin 125mg; AG: Amoxicillin 250mg; AH: Dexamethasone; AI: Zinc syrup; AJ: Zinc tablet; AK: Zinc ORS co-pack; AL: ORS sachets 200ml; AM: ORS sachets 500ml; AN: ORS sachets 1L.
